# Supplementary material for: Microbial Consortium of Jeju Traditional Fermented Foods and Their Cosmetic Ingredient Potential
Source: Preprints.org preprint supplement (doi:10.20944/preprints202405.1936.v1), 2024-05-29
Supplement: Supplementary file 1 [file supplementary]

## Sheet: OR
Taxon name	Count	Proportion(%)
Latilactobacillus sakei group	30539	87.1671
Leuconostoc mesenteroides group	1723	4.9179
Weissella minor group	1519	4.3357
Carnobacterium divergens group	296	0.8449
Tetragenococcus halophilus group	135	0.3853
Leuconostoc gelidum group	115	0.3282
Leuconostoc lactis	59	0.1684
Brochothrix thermosphacta	58	0.1655
Rahnella inusitata	49	0.1399
Leuconostoc pseudomesenteroides group	41	0.117
Weissella confusa group	29	0.0828
Virgibacillus pantothenticus group	23	0.0656
Leuconostoc citreum group	18	0.0514
Carnobacterium gallinarum group	11	0.0314
Lactobacillus algidus	11	0.0314
Lactococcus lactis group	10	0.0285
Serratia liquefaciens group	10	0.0285
Lacticaseibacillus manihotivorans group	9	0.0257
Leuconostoc kimchii group	9	0.0257
Vagococcus penaei	7	0.02
Weissella diestrammenae	7	0.02
Leuconostoc carnosum	6	0.0171
Proteus vulgaris group	6	0.0171
Lactococcus garvieae group	5	0.0143
Rahnella bruchi group	4	0.0114
Weissella ghanensis group	4	0.0114
AF087643_s	3	0.0086
Curtobacterium plantarum group	3	0.0086
Enterococcus phoeniculicola group	3	0.0086
Haemophilus parainfluenzae group	3	0.0086
Photobacterium ganghwense	3	0.0086
Serratia plymuthica group	3	0.0086
AJ583204_s	2	0.0057
Exiguobacterium acetylicum group	2	0.0057
GL872355_s	2	0.0057
Macrococcus caseolyticus group	2	0.0057
Ralstonia syzygii group	2	0.0057
Vagococcus carniphilus	2	0.0057
Vagococcus fluvialis	2	0.0057
AB284946_s	1	0.0029
Bacillus amyloliquefaciens group	1	0.0029
Bacillus subtilis group	1	0.0029
Bacteroides vulgatus	1	0.0029
Clostridium butyricum	1	0.0029
Enterobacter soli	1	0.0029
Enterococcus dispar group	1	0.0029
Enterococcus faecalis	1	0.0029
Enterococcus mundtii	1	0.0029
Kocuria rhizophila group	1	0.0029
Lacticaseibacillus brantae group	1	0.0029
Megasphaera micronuciformis	1	0.0029
Methylophilus flavus group	1	0.0029
Moellerella wisconsensis	1	0.0029
Pantoea ananatis group	1	0.0029
Pseudomonas putida group	1	0.0029
Serratia odorifera	1	0.0029
Sporolactobacillus nakayamae group	1	0.0029
Tetragenococcus koreensis	1	0.0029
Vibrio chagasii group	1	0.0029
Vibrio parahaemolyticus group	1	0.0029

## Sheet: SG
Taxon name	Count	Proportion(%)
Tetragenococcus halophilus group	6482	37.6532
Halomonas garicola	5549	32.2335
Bacillus subtilis group	749	4.3509
Psychroflexus halocasei	630	3.6596
Halomonas jeotgali	604	3.5086
Chromohalobacter beijerinckii group	494	2.8696
Staphylococcus equorum group	395	2.2945
Chromohalobacter canadensis	336	1.9518
Bacillus amyloliquefaciens group	118	0.6854
Salinicoccus sediminis	95	0.5518
Weissella confusa group	92	0.5344
Halomonas subglaciescola	77	0.4473
Marinobacter piscensis	59	0.3427
Chromohalobacter marismortui	50	0.2904
Dietzia maris group	34	0.1975
Lelliottia amnigena group	32	0.1859
Halanaerobium saccharolyticum group	30	0.1743
Ralstonia pickettii	27	0.1568
Weissella ghanensis group	23	0.1336
Staphylococcus sciuri group	22	0.1278
Staphylococcus xylosus group	22	0.1278
Bacillus licheniformis group	19	0.1104
Halomonas halophila group	18	0.1046
Tetragenococcus muriaticus	17	0.0988
FJ380155_s	16	0.0929
Rahnella aquatilis group	16	0.0929
Acinetobacter proteolyticus	12	0.0697
Bacillus mojavensis group	12	0.0697
Bacteroides acidifaciens	11	0.0639
Colwellia aestuarii	11	0.0639
Escherichia hermannii group	11	0.0639
Bacillus pumilus group	10	0.0581
Halomonas halodurans	10	0.0581
Leuconostoc citreum group	10	0.0581
Pantoea ananatis group	10	0.0581
Rahnella bruchi group	10	0.0581
Enterobacter asburiae group	9	0.0523
Buttiauxella agrestis group	8	0.0465
Enterobacter cloacae group	8	0.0465
Halanaerobium praevalens	8	0.0465
Pantoea dispersa group	8	0.0465
Serratia liquefaciens group	8	0.0465
Tetragenococcus koreensis	8	0.0465
AJ308395_s	7	0.0407
Blautia coccoides group	7	0.0407
Corynebacterium variabile group	7	0.0407
Lactococcus lactis group	7	0.0407
Litoreibacter arenae	7	0.0407
Pseudomonas geniculata group	7	0.0407
Pseudorhodobacter aquimaris	7	0.0407
Ralstonia syzygii group	7	0.0407
Salinisphaera japonica	7	0.0407
Serratia marcescens group	7	0.0407
Yeosuana aromativorans	7	0.0407
Acinetobacter johnsonii	6	0.0349
Bizionia paragorgiae	6	0.0349
Paraburkholderia caledonica	6	0.0349
Pediococcus acidilactici group	6	0.0349
Pseudomonas migulae group	6	0.0349
Staphylococcus saprophyticus group	6	0.0349
AJ344556_s	5	0.029
Bacillus oshimensis group	5	0.029
Dietzia psychralcaliphila group	5	0.029
FJ950566_s	5	0.029
Flavobacterium resistens group	5	0.029
Halomonas organivorans	5	0.029
Leuconostoc pseudomesenteroides group	5	0.029
Litoreibacter albidus group	5	0.029
Pseudomonas azotoformans group	5	0.029
Pseudomonas oleovorans group	5	0.029
Staphylococcus succinus group	5	0.029
Acinetobacter bereziniae group	4	0.0232
Aeromonas veronii group	4	0.0232
Brumimicrobium mesophilum	4	0.0232
CP006882_s group	4	0.0232
DQ116008_s	4	0.0232
Enterobacter soli	4	0.0232
KC904087_s	4	0.0232
Kluyvera cryocrescens	4	0.0232
Lactobacillus brevis	4	0.0232
Leuconostoc mesenteroides group	4	0.0232
Loktanella litorea group	4	0.0232
Massilia timonae	4	0.0232
Methylobacterium mesophilicum group	4	0.0232
Pseudomonas tolaasii group	4	0.0232
Psychrobacter celer	4	0.0232
Psychrobacter phenylpyruvicus	4	0.0232
Winogradskyella arenosi group	4	0.0232
AF235110_s	3	0.0174
AF513400_s	3	0.0174
AM934643_s	3	0.0174
Aequorivita capsosiphonis	3	0.0174
Aeromicrobium erythreum group	3	0.0174
Atopostipes suicloacalis	3	0.0174
Bacillus aquimaris	3	0.0174
Bizionia algoritergicola group	3	0.0174
Cobetia marina group	3	0.0174
Colwellia meonggei	3	0.0174
Enterococcus dispar group	3	0.0174
GQ274302_s	3	0.0174
Gordonia rubripertincta group	3	0.0174
HM468053_s	3	0.0174
Halanaerobium fermentans	3	0.0174
JTJJ_s group	3	0.0174
Lentibacillus lacisalsi	3	0.0174
Leucobacter komagatae group	3	0.0174
Marinilactibacillus psychrotolerans group	3	0.0174
Ornithinicoccus hortensis	3	0.0174
Paraburkholderia silvatlantica	3	0.0174
Paracoccus koreensis	3	0.0174
Pectobacterium carotovorum group	3	0.0174
Pseudomonas brassicacearum group	3	0.0174
Pseudomonas composti	3	0.0174
Pseudomonas helleri	3	0.0174
Psychrobacter faecalis group	3	0.0174
Rhizobium larrymoorei group	3	0.0174
Rosenbergiella nectarea	3	0.0174
Salinicoccus jeotgali group	3	0.0174
Sulfitobacter pontiacus	3	0.0174
AM930316_s	2	0.0116
Acinetobacter calcoaceticus group	2	0.0116
Acinetobacter gerneri	2	0.0116
Acinetobacter parvus group	2	0.0116
Acinetobacter ursingii	2	0.0116
Ahrensia kielensis group	2	0.0116
Altererythrobacter oceanensis	2	0.0116
Amaricoccus tamworthensis	2	0.0116
BAXB_s	2	0.0116
Bifidobacterium animalis group	2	0.0116
Brachybacterium faecium group	2	0.0116
Comamonas kerstersii group	2	0.0116
Corynebacterium glutamicum	2	0.0116
Enterococcus durans group	2	0.0116
Enterococcus faecalis	2	0.0116
Enterococcus malodoratus group	2	0.0116
Erwinia rhapontici	2	0.0116
Erythrobacter citreus group	2	0.0116
FJ879254_s	2	0.0116
Flavobacterium antarcticum	2	0.0116
Flavobacterium banpakuense	2	0.0116
Gelidibacter mesophilus	2	0.0116
Gillisia hiemivivida group	2	0.0116
HM032000_s	2	0.0116
HM768685_s	2	0.0116
Janibacter cremeus	2	0.0116
Kurthia zopfii group	2	0.0116
Leucobacter alluvii group	2	0.0116
Megamonas funiformis	2	0.0116
Paenibacillus daejeonensis	2	0.0116
Pelomonas saccharophila group	2	0.0116
Pseudoalteromonas atlantica group	2	0.0116
Pseudodonghicola xiamenensis group	2	0.0116
Pseudomonas anguilliseptica	2	0.0116
Pseudomonas fulva group	2	0.0116
Psychrobacter fulvigenes	2	0.0116
Psychrobacter proteolyticus group	2	0.0116
Quadrisphaera granulorum	2	0.0116
Shinella fusca	2	0.0116
Sphingorhabdus flavimaris	2	0.0116
Staphylococcus hominis group	2	0.0116
Ulvibacter antarcticus	2	0.0116
Vagococcus penaei	2	0.0116
AB374369_s	1	0.0058
AB533955_s	1	0.0058
ARTD_s	1	0.0058
AY436806_s	1	0.0058
Acinetobacter albensis	1	0.0058
Acinetobacter vivianii group	1	0.0058
Alistipes putredinis	1	0.0058
Azospirillum melinis group	1	0.0058
Bacillus idriensis	1	0.0058
Bacillus megaterium group	1	0.0058
Bacillus sonorensis group	1	0.0058
Blautia wexlerae	1	0.0058
Brachybacterium huguangmaarense	1	0.0058
Brevibacterium picturae group	1	0.0058
Chromohalobacter nigrandesensis	1	0.0058
Clostridium arbusti	1	0.0058
Corynebacterium glycinophilum	1	0.0058
Curtobacterium luteum group	1	0.0058
DQ286727_s	1	0.0058
EF515971_s	1	0.0058
EF603904_s	1	0.0058
EU133464_s	1	0.0058
Endozoicomonas elysicola	1	0.0058
Escherichia coli group	1	0.0058
FN428770_s	1	0.0058
Geodermatophilus soli group	1	0.0058
Gordonia caeni	1	0.0058
HQ203942_s	1	0.0058
HQ336491_s	1	0.0058
Halomonas stenophila	1	0.0058
JF049400_s	1	0.0058
JFYL_s	1	0.0058
JQEY_s	1	0.0058
JX240852_s	1	0.0058
Janthinobacterium lividum group	1	0.0058
Klebsiella pneumoniae group	1	0.0058
Lactiplantibacillus plantarum group	1	0.0058
Latilactobacillus sakei group	1	0.0058
Lactococcus garvieae group	1	0.0058
Macrococcus caseolyticus group	1	0.0058
Marinobacter aromaticivorans	1	0.0058
Marinobacter maritimus	1	0.0058
Mesonia ostreae	1	0.0058
Microbacterium dextranolyticum group	1	0.0058
Microbacterium imperiale group	1	0.0058
Paenibacillus polymyxa group	1	0.0058
Paenirhodobacter enshiensis	1	0.0058
Paraburkholderia kururiensis	1	0.0058
Ponticoccus litoralis	1	0.0058
Pseudomonas caricapapayae group	1	0.0058
Pseudomonas coronafaciens	1	0.0058
Pseudomonas flavescens group	1	0.0058
Pseudomonas fragi group	1	0.0058
Pseudomonas veronii group	1	0.0058
Pseudonocardia hydrocarbonoxydans group	1	0.0058
Pseudorhodoferax caeni group	1	0.0058
Pseudoroseovarius crassostreae group	1	0.0058
Pseudoxanthomonas japonensis	1	0.0058
Pseudoxanthomonas mexicana	1	0.0058
Psychrobacter aquimaris	1	0.0058
Rahnella inusitata	1	0.0058
Raoultella ornithinolytica group	1	0.0058
Rhizobium radiobacter group	1	0.0058
Rhodobacter ovatus	1	0.0058
Roseovarius litoreus	1	0.0058
Serratia plymuthica group	1	0.0058
Sphingobacterium faecium group	1	0.0058
Staphylococcus lentus group	1	0.0058
Subsaximicrobium wynnwilliamsii	1	0.0058
Tenacibaculum litopenaei	1	0.0058
Tenacibaculum lutimaris group	1	0.0058
Terrimonas lutea	1	0.0058
Ureibacillus thermosphaericus	1	0.0058
Xanthomonas campestris group	1	0.0058
Xenophilus arseniciresistens	1	0.0058

## Sheet: CN
Taxon name	Count	Proportion(%)
Tetragenococcus halophilus group	34875	96.8293
FJ380155_s	187	0.5192
Bacillus subtilis group	161	0.447
Staphylococcus equorum group	84	0.2332
Bacillus amyloliquefaciens group	61	0.1694
Bacillus sonorensis group	52	0.1444
Bacillus licheniformis group	50	0.1388
AJ583204_s	49	0.136
Salinivibrio costicola group	38	0.1055
Halomonas garicola	37	0.1027
Bacillus altitudinis group	32	0.0888
Bacillus pumilus group	28	0.0777
GQ133595_s	22	0.0611
Ralstonia pickettii	21	0.0583
CP006882_s group	19	0.0528
Ralstonia syzygii group	18	0.05
Tetragenococcus koreensis	14	0.0389
Halanaerobium praevalens	12	0.0333
JF145020_s	10	0.0278
Alkalibacterium gilvum	9	0.025
Bradyrhizobium cytisi group	7	0.0194
Halomonas jeotgali	7	0.0194
Weissella ghanensis group	7	0.0194
AY532586_s	6	0.0167
Atopostipes suicloacalis	6	0.0167
Halomonas subglaciescola	6	0.0167
Arcobacter marinus	5	0.0139
Tetragenococcus muriaticus	5	0.0139
Halanaerobium saccharolyticum group	4	0.0111
Paraburkholderia kururiensis	4	0.0111
Enterobacter cloacae group	3	0.0083
Enterococcus durans group	3	0.0083
HQ716126_s	3	0.0083
JF266208_s	3	0.0083
Latilactobacillus sakei group	3	0.0083
Megamonas funiformis	3	0.0083
Nesterenkonia xinjiangensis group	3	0.0083
Pediococcus acidilactici group	3	0.0083
Photobacterium phosphoreum group	3	0.0083
Rhizobium larrymoorei group	3	0.0083
Tetragenococcus osmophilus	3	0.0083
Tissierella creatinophila	3	0.0083
Vibrio lentus group	3	0.0083
AJ583166_s	2	0.0056
Alistipes shahii	2	0.0056
Bacillus coagulans	2	0.0056
Brevibacterium picturae group	2	0.0056
Cereibacter changlensis	2	0.0056
Enterococcus casseliflavus group	2	0.0056
Gaiella occulta	2	0.0056
Kocuria rhizophila group	2	0.0056
Leuconostoc citreum group	2	0.0056
Methylobacterium komagatae	2	0.0056
Methylobacterium mesophilicum group	2	0.0056
Paracoccus koreensis	2	0.0056
Paracoccus stylophorae	2	0.0056
Photobacterium aquimaris group	2	0.0056
Pseudomonas geniculata group	2	0.0056
Pseudomonas migulae group	2	0.0056
Rhodococcus fascians group	2	0.0056
Salinicoccus sediminis	2	0.0056
Vibrio alginolyticus group	2	0.0056
Aeromicrobium erythreum group	1	0.0028
Agathobacter rectalis	1	0.0028
Arthrobacter globiformis group	1	0.0028
Blautia wexlerae	1	0.0028
Catenibacterium mitsuokai	1	0.0028
DQ345464_s	1	0.0028
EU451397_s	1	0.0028
EU801228_s	1	0.0028
Enterobacter soli	1	0.0028
Enterococcus faecalis	1	0.0028
Enterovibrio norvegicus	1	0.0028
FJ748819_s	1	0.0028
HQ393427_s	1	0.0028
HQ768009_s	1	0.0028
Herbaspirillum huttiense group	1	0.0028
Idiomarina loihiensis	1	0.0028
JF500287_s	1	0.0028
JQ772010_s	1	0.0028
Lactobacillus rennini	1	0.0028
Methylobacterium aquaticum group	1	0.0028
Methylobacterium extorquens group	1	0.0028
Microbacterium dextranolyticum group	1	0.0028
Paracoccus marinus group	1	0.0028
Pseudoalteromonas atlantica group	1	0.0028
Pseudomonas beteli	1	0.0028
Roseburia cecicola group	1	0.0028
Shinella fusca	1	0.0028
Vibrio halioticoli group	1	0.0028

## Sheet: TC
Taxon name	Count	Proportion(%)
Bacillus subtilis group	5236	23.4325
Bacillus sonorensis group	4307	19.275
Leuconostoc citreum group	2721	12.1772
Psychrobacter immobilis group	1527	6.8337
Bacillus amyloliquefaciens group	1249	5.5896
Bacillus licheniformis group	1144	5.1197
Psychrobacter faecalis group	723	3.2356
Staphylococcus equorum group	513	2.2958
Weissella confusa group	417	1.8662
Bacillus pumilus group	400	1.7901
Bacillus altitudinis group	348	1.5574
Ralstonia pickettii	255	1.1412
Psychrobacter alimentarius group	160	0.716
Staphylococcus saprophyticus group	146	0.6534
Staphylococcus sciuri group	140	0.6265
Bacteroides acidifaciens	110	0.4923
Enterococcus casseliflavus group	109	0.4878
Blautia coccoides group	92	0.4117
Pediococcus acidilactici group	89	0.3983
Bacillus clausii group	82	0.367
Staphylococcus xylosus group	70	0.3133
Paraburkholderia caledonica	66	0.2954
Bacillus coagulans	65	0.2909
Pseudomonas migulae group	62	0.2775
Ralstonia syzygii group	58	0.2596
Leuconostoc pseudomesenteroides group	55	0.2461
Staphylococcus kloosii	53	0.2372
Lactiplantibacillus plantarum group	49	0.2193
Weissella ghanensis group	47	0.2103
Weissella hellenica group	46	0.2059
Bacillus mojavensis group	44	0.1969
Pantoea ananatis group	38	0.1701
Curtobacterium luteum group	36	0.1611
Enterococcus faecalis	36	0.1611
Lactococcus lactis group	33	0.1477
Kocuria rhizophila group	28	0.1253
Kurthia gibsonii	27	0.1208
Corynebacterium nuruki	24	0.1074
Psychrilyobacter atlanticus	24	0.1074
Psychrobacter urativorans group	24	0.1074
Pseudomonas geniculata group	23	0.1029
Pantoea dispersa group	22	0.0985
Aureimonas ureilytica	21	0.094
Psychrobacter proteolyticus group	18	0.0806
Streptomyces clavifer group	18	0.0806
Bacillus carboniphilus group	17	0.0761
Escherichia coli group	17	0.0761
Methylobacterium mesophilicum group	17	0.0761
Paraburkholderia kururiensis	17	0.0761
Psychrobacter ciconiae	15	0.0671
Enterococcus malodoratus group	14	0.0627
Bacillus idriensis	13	0.0582
Enterobacter asburiae group	13	0.0582
Lactobacillus brevis	13	0.0582
Lactococcus garvieae group	13	0.0582
Clavibacter michiganensis group	12	0.0537
Psychrobacter maritimus	12	0.0537
Acinetobacter gerneri	11	0.0492
EF603904_s	11	0.0492
Vibrio lentus group	11	0.0492
Cellulophaga lytica group	10	0.0448
FJ950566_s	10	0.0448
AB606392_s	9	0.0403
FJ879254_s	9	0.0403
Lactobacillus fermentum	9	0.0403
Pseudokineococcus lusitanus	9	0.0403
AJ308395_s	8	0.0358
Bacillus thermolactis group	8	0.0358
Curtobacterium plantarum group	8	0.0358
EF515912_s	8	0.0358
JN527710_s	8	0.0358
Klebsiella pneumoniae group	8	0.0358
Methylobacterium marchantiae group	8	0.0358
Tetragenococcus halophilus group	8	0.0358
Aquabacter spiritensis	7	0.0313
Bacillus aquimaris	7	0.0313
Enhydrobacter aerosaccus group	7	0.0313
Enterococcus saccharolyticus group	7	0.0313
Methylobacterium variabile	7	0.0313
Microbacterium dextranolyticum group	7	0.0313
Weissella minor group	7	0.0313
Bacillus gibsonii group	6	0.0269
Bacillus megaterium group	6	0.0269
EF603835_s	6	0.0269
Kocuria kristinae	6	0.0269
Limosilactobacillus reuteri group	6	0.0269
Latilactobacillus sakei group	6	0.0269
Leucobacter tardus	6	0.0269
Leuconostoc mesenteroides group	6	0.0269
Microbacterium nanhaiense	6	0.0269
Paraburkholderia silvatlantica	6	0.0269
Rhodococcus erythropolis group	6	0.0269
Staphylococcus cohnii group	6	0.0269
AF513933_s	5	0.0224
AM930316_s	5	0.0224
Actinomyces radicidentis group	5	0.0224
Aliivibrio logei group	5	0.0224
Brevibacillus borstelensis group	5	0.0224
Clostridium celatum group	5	0.0224
Enterobacter cloacae group	5	0.0224
Enterococcus durans group	5	0.0224
HQ393410_s	5	0.0224
Pelomonas saccharophila group	5	0.0224
Pseudoruegeria haliotis	5	0.0224
Psychrobacter namhaensis	5	0.0224
Staphylococcus lentus group	5	0.0224
Vagococcus penaei	5	0.0224
Xanthomonas axonopodis group	5	0.0224
AB298755_s	4	0.0179
Aeribacillus pallidus	4	0.0179
Bacillus oleivorans	4	0.0179
Brevibacterium iodinum group	4	0.0179
Clostridium aerotolerans group	4	0.0179
Clostridium sardiniense group	4	0.0179
DQ486502_s	4	0.0179
Delftia tsuruhatensis group	4	0.0179
Dermacoccus nishinomiyaensis group	4	0.0179
EU592403_s	4	0.0179
Enterococcus dispar group	4	0.0179
Enterococcus phoeniculicola group	4	0.0179
Geodermatophilus soli group	4	0.0179
JQEY_s	4	0.0179
Kocuria palustris group	4	0.0179
Lactobacillus gasseri group	4	0.0179
Paraburkholderia insulsa	4	0.0179
Pseudomonas beteli	4	0.0179
Pseudomonas oleovorans group	4	0.0179
Psychrobacter aquimaris	4	0.0179
Rhizobium larrymoorei group	4	0.0179
Vagococcus fluvialis	4	0.0179
Vibrio splendidus group	4	0.0179
AM934851_s	3	0.0134
Alkalilimnicola ehrlichii	3	0.0134
Bacillus oshimensis group	3	0.0134
Bifidobacterium adolescentis group	3	0.0134
Brachybacterium faecium group	3	0.0134
Brachybacterium nesterenkovii group	3	0.0134
Compostibacillus humi	3	0.0134
Corynebacterium variabile group	3	0.0134
EF605065_s	3	0.0134
FJ626909_s	3	0.0134
Fictibacillus gelatini	3	0.0134
Kineococcus aurantiacus group	3	0.0134
Latilactobacillus casei group	3	0.0134
Leucobacter celer group	3	0.0134
Ochrobactrum intermedium group	3	0.0134
Propionigenium maris	3	0.0134
Rhizobium massiliae group	3	0.0134
Rhizobium radiobacter group	3	0.0134
Solirubrobacter ginsenosidimutans	3	0.0134
Staphylococcus haemolyticus group	3	0.0134
AB533955_s	2	0.009
ABCF_s	2	0.009
AM930272_s	2	0.009
AY553119_s	2	0.009
Bacillus dabaoshanensis	2	0.009
Blastococcus aggregatus group	2	0.009
Brevibacterium senegalense group	2	0.009
Brevundimonas vesicularis group	2	0.009
DQ103629_s	2	0.009
DQ103665_s	2	0.009
DQ815395_s	2	0.009
Dyella jejuensis	2	0.009
EF406536_s	2	0.009
EF436397_s	2	0.009
EF562076_s	2	0.009
EF604635_s	2	0.009
Escherichia hermannii group	2	0.009
FN436133_s	2	0.009
GQ347793_s	2	0.009
GU454892_s	2	0.009
HQ225113_s	2	0.009
HQ324879_s	2	0.009
JF085461_s	2	0.009
JN523328_s	2	0.009
JX391116_s	2	0.009
Lactobacillus iners	2	0.009
Leucobacter chromiireducens group	2	0.009
Macrococcus caseolyticus group	2	0.009
Methylobacterium extorquens group	2	0.009
Microbacterium luteolum group	2	0.009
Micromonospora yangpuensis	2	0.009
Neisseria perflava group	2	0.009
Nocardioides zeae	2	0.009
Oceaniovalibus guishaninsula	2	0.009
Pseudomonas aeruginosa group	2	0.009
Pseudomonas caricapapayae group	2	0.009
Pseudomonas fulva group	2	0.009
Psychrobacter adeliensis	2	0.009
Psychrobacter glacincola group	2	0.009
Psychrobacter phenylpyruvicus	2	0.009
Rhodovibrio sodomensis	2	0.009
Roseivivax halotolerans	2	0.009
Ruegeria conchae	2	0.009
Salmonella bongori	2	0.009
Sanguibacter keddieii group	2	0.009
Sphingomonas trueperi group	2	0.009
Sphingopyxis panaciterrulae group	2	0.009
Staphylococcus epidermidis group	2	0.009
Streptococcus sanguinis	2	0.009
Streptomyces flavovirens group	2	0.009
Thermoactinomyces vulgaris	2	0.009
Ureibacillus thermosphaericus	2	0.009
AJ279038_s	1	0.0045
AJ400262_s	1	0.0045
AM500747_s	1	0.0045
AXAI_s group	1	0.0045
AY395433_s	1	0.0045
Achromobacter xylosoxidans group	1	0.0045
Acidovorax soli	1	0.0045
Acinetobacter baumannii	1	0.0045
Acinetobacter bereziniae group	1	0.0045
Acinetobacter parvus group	1	0.0045
Acinetobacter ursingii	1	0.0045
Aquihabitans daechungensis	1	0.0045
Bacillus acidiproducens	1	0.0045
Bacillus decisifrondis group	1	0.0045
Bacillus fumarioli group	1	0.0045
Bacillus gottheilii group	1	0.0045
Bacillus smithii	1	0.0045
Bacillus thermoamylovorans group	1	0.0045
Bacillus vanillea	1	0.0045
Blautia wexlerae	1	0.0045
CP003078_s	1	0.0045
Carnobacterium divergens group	1	0.0045
Cellulomonas biazotea group	1	0.0045
Chryseobacterium culicis	1	0.0045
Citrobacter amalonaticus group	1	0.0045
Clostridium arbusti	1	0.0045
Clostridium huakuii group	1	0.0045
Clostridium tyrobutyricum	1	0.0045
Corynebacterium aurimucosum group	1	0.0045
Corynebacterium doosanense	1	0.0045
Corynebacterium glycinophilum	1	0.0045
Corynebacterium kroppenstedtii group	1	0.0045
DQ116008_s	1	0.0045
DQ378266_s	1	0.0045
DQ501327_s	1	0.0045
DQ796138_s	1	0.0045
DQ810078_s	1	0.0045
Dietzia cinnamea group	1	0.0045
EF406456_s	1	0.0045
EF602989_s	1	0.0045
EF604981_s	1	0.0045
EU491549_s	1	0.0045
EU801228_s	1	0.0045
EU804015_s	1	0.0045
Eubacterium tenue group	1	0.0045
FJ660543_s	1	0.0045
Faecalibacterium prausnitzii	1	0.0045
GL538271_s group	1	0.0045
GQ451281_s	1	0.0045
GU118263_s	1	0.0045
GU305845_s	1	0.0045
GU454872_s	1	0.0045
HM135522_s	1	0.0045
HQ768009_s	1	0.0045
HQ857629_s	1	0.0045
JF514260_s	1	0.0045
JQ861371_s	1	0.0045
JRKM_s	1	0.0045
JX001319_s	1	0.0045
LN913006_s	1	0.0045
Lactobacillus intestinalis	1	0.0045
Lactobacillus murinus	1	0.0045
Lactobacillus vespulae	1	0.0045
Megamonas funiformis	1	0.0045
Meiothermus ruber group	1	0.0045
Methylobacterium aquaticum group	1	0.0045
Micromonospora matsumotoense group	1	0.0045
Mycobacterium smegmatis group	1	0.0045
Nesterenkonia alkaliphila	1	0.0045
Oceanobacillus chironomi	1	0.0045
Paenirhodobacter enshiensis	1	0.0045
Paraburkholderia ferrariae	1	0.0045
Photobacterium aquimaris group	1	0.0045
Pontimonas salivibrio	1	0.0045
Propionibacterium avidum	1	0.0045
Pseudomonas synxantha	1	0.0045
Pseudonocardia kujensis	1	0.0045
Psychrobacter cryohalolentis	1	0.0045
Rahnella bruchi group	1	0.0045
Roseburia intestinalis group	1	0.0045
Rothia terrae	1	0.0045
Salmonella enterica group	1	0.0045
Serratia marcescens group	1	0.0045
Staphylococcus carnosus group	1	0.0045
Staphylococcus hominis group	1	0.0045
Staphylococcus petrasii group	1	0.0045
Terrisporobacter petrolearius	1	0.0045
Turicibacter sanguinis	1	0.0045
Weissella kandleri group	1	0.0045

## Sheet: TL
Taxon name	Count	Proportion(%)
Tetragenococcus halophilus group	23576	71.3365
Staphylococcus equorum group	2717	8.2211
FJ380155_s	1658	5.0168
Bacillus subtilis group	894	2.7051
Bacillus licheniformis group	357	1.0802
Tetragenococcus muriaticus	228	0.6899
Bacillus amyloliquefaciens group	226	0.6838
Salinivibrio costicola group	195	0.59
Tissierella creatinophila	161	0.4872
Bacillus sonorensis group	155	0.469
Halomonas garicola	154	0.466
Weissella confusa group	120	0.3631
Bacillus pumilus group	105	0.3177
Staphylococcus sciuri group	100	0.3026
AJ583204_s	94	0.2844
GQ133595_s	92	0.2784
Halanaerobium fermentans	92	0.2784
Ralstonia syzygii group	85	0.2572
Weissella ghanensis group	81	0.2451
Tetragenococcus osmophilus	72	0.2179
Bacillus altitudinis group	68	0.2058
Staphylococcus xylosus group	55	0.1664
Atopostipes suicloacalis	43	0.1301
Tetragenococcus koreensis	40	0.121
Fictibacillus gelatini	36	0.1089
Klebsiella pneumoniae group	35	0.1059
Salinicoccus sediminis	32	0.0968
Alkalibacterium gilvum	30	0.0908
Bacillus clausii group	29	0.0877
Halanaerobium saccharolyticum group	28	0.0847
Brevibacillus borstelensis group	26	0.0787
Peptostreptococcus russellii	22	0.0666
Ralstonia pickettii	22	0.0666
Enterobacter asburiae group	21	0.0635
Pediococcus acidilactici group	21	0.0635
HQ716126_s	19	0.0575
Weissella hellenica group	19	0.0575
Yersinia enterocolitica group	19	0.0575
FJ950566_s	18	0.0545
ABGR_s	15	0.0454
Staphylococcus cohnii group	15	0.0454
Staphylococcus saprophyticus group	15	0.0454
Bacillus idriensis	14	0.0424
CP006882_s group	13	0.0393
Halomonas subglaciescola	13	0.0393
Enterobacter cloacae group	12	0.0363
Bacillus mojavensis group	11	0.0333
Vagococcus penaei	11	0.0333
Enterococcus durans group	10	0.0303
Escherichia hermannii group	10	0.0303
Gallicola barnesae	10	0.0303
Ochrobactrum intermedium group	10	0.0303
Aureimonas ureilytica	9	0.0272
EU358722_s	9	0.0272
Pantoea dispersa group	9	0.0272
ABCF_s	8	0.0242
Bacillus smithii	8	0.0242
Lactiplantibacillus plantarum group	8	0.0242
Paraburkholderia kururiensis	8	0.0242
Pseudomonas geniculata group	8	0.0242
Brachybacterium ginsengisoli	7	0.0212
Clostridium arbusti	7	0.0212
Corynebacterium testudinoris	7	0.0212
Enterobacter aerogenes group	7	0.0212
Glutamicibacter nicotianae group	7	0.0212
Staphylococcus lentus group	7	0.0212
AM500828_s	6	0.0182
Actinomyces radicidentis group	6	0.0182
Enterococcus casseliflavus group	6	0.0182
Lactobacillus brevis	6	0.0182
Latilactobacillus sakei group	6	0.0182
Leucobacter tardus	6	0.0182
Leuconostoc citreum group	6	0.0182
Methylobacterium extorquens group	6	0.0182
Rhodococcus fascians group	6	0.0182
Staphylococcus succinus group	6	0.0182
Vagococcus fessus	6	0.0182
Azorhizobium caulinodans	5	0.0151
Brevibacterium picturae group	5	0.0151
Brucella melitensis group	5	0.0151
Enterococcus dispar group	5	0.0151
Kocuria rhizophila group	5	0.0151
Leucobacter komagatae group	5	0.0151
Leuconostoc pseudomesenteroides group	5	0.0151
Pantoea ananatis group	5	0.0151
Pseudochrobactrum asaccharolyticum group	5	0.0151
Pseudorhodobacter aquimaris	5	0.0151
Psychrobacter faecalis group	5	0.0151
Ruegeria atlantica	5	0.0151
Staphylococcus kloosii	5	0.0151
Yaniella halotolerans	5	0.0151
Anoxybacillus rupiensis	4	0.0121
Bacillus aquimaris	4	0.0121
Brevibacterium iodinum group	4	0.0121
Brevundimonas vesicularis group	4	0.0121
Corynebacterium variabile group	4	0.0121
Curtobacterium luteum group	4	0.0121
Dietzia maris group	4	0.0121
Enterobacter soli	4	0.0121
Enterococcus faecalis	4	0.0121
Halomonas jeotgali	4	0.0121
Lactococcus lactis group	4	0.0121
Microbacterium nanhaiense	4	0.0121
Paracoccus aminovorans group	4	0.0121
Rhizobium tibeticum group	4	0.0121
Roseomonas cervicalis	4	0.0121
Weissella minor group	4	0.0121
AM930316_s	3	0.0091
Aquabacter spiritensis	3	0.0091
Bacillus carboniphilus group	3	0.0091
Bacillus coagulans	3	0.0091
Bacteroides uniformis	3	0.0091
Brevundimonas bullata group	3	0.0091
Curtobacterium plantarum group	3	0.0091
DQ404659_s	3	0.0091
DQ796138_s	3	0.0091
Enterococcus phoeniculicola group	3	0.0091
Halanaerobium praevalens	3	0.0091
JF145020_s	3	0.0091
LATR_s group	3	0.0091
Lactobacillus mali group	3	0.0091
Methylobacterium aquaticum group	3	0.0091
Methylobacterium komagatae	3	0.0091
Methylobacterium marchantiae group	3	0.0091
Microbacterium arabinogalactanolyticum group	3	0.0091
Paracoccus marinus group	3	0.0091
Photobacterium angustum	3	0.0091
Pseudomonas migulae group	3	0.0091
Rhizobium larrymoorei group	3	0.0091
Roseomonas aerophila	3	0.0091
Salinicoccus jeotgali group	3	0.0091
Stenotrophomonas nitritireducens	3	0.0091
Vibrio chagasii group	3	0.0091
Xanthomonas axonopodis group	3	0.0091
AJ315073_s	2	0.0061
AY167260_s	2	0.0061
AY167967_s	2	0.0061
AY532586_s	2	0.0061
Arthrobacter globiformis group	2	0.0061
Asanoa ferruginea	2	0.0061
Bacillus firmus group	2	0.0061
Brevundimonas staleyi	2	0.0061
CP001657_s	2	0.0061
Camelimonas lactis group	2	0.0061
Clostridium beijerinckii group	2	0.0061
Corynebacterium nuruki	2	0.0061
Curtobacterium albidum group	2	0.0061
DQ129449_s	2	0.0061
DQ337541_s	2	0.0061
Enterococcus sulfureus group	2	0.0061
FM995171_s	2	0.0061
Frondihabitans australicus group	2	0.0061
GQ443099_s	2	0.0061
Gordonia caeni	2	0.0061
Gordonia rubripertincta group	2	0.0061
HQ418455_s	2	0.0061
Halomonas alimentaria	2	0.0061
JFYL_s	2	0.0061
Jeotgalicoccus halotolerans group	2	0.0061
Kaistia terrae group	2	0.0061
Kocuria kristinae	2	0.0061
Kurthia gibsonii	2	0.0061
LMQD_s	2	0.0061
Lactococcus taiwanensis	2	0.0061
Methylobacterium mesophilicum group	2	0.0061
Microbacterium imperiale group	2	0.0061
Microbacterium maritypicum group	2	0.0061
Mobilicoccus pelagius	2	0.0061
Novosphingobium chloroacetimidivorans	2	0.0061
Novosphingobium pentaromativorans group	2	0.0061
Paracoccus koreensis	2	0.0061
Paramesorhizobium deserti	2	0.0061
Pelagimonas varians	2	0.0061
Photobacterium aquimaris group	2	0.0061
Pseudarthrobacter chlorophenolicus group	2	0.0061
Pseudoalteromonas atlantica group	2	0.0061
Pseudomonas flavescens group	2	0.0061
Psychrobacter celer	2	0.0061
Rhizobium giardinii group	2	0.0061
Rhodococcus erythropolis group	2	0.0061
Salinibacterium xinjiangense	2	0.0061
Serratia marcescens group	2	0.0061
Sphingomonas kaistensis group	2	0.0061
Sphingomonas trueperi group	2	0.0061
Staphylococcus haemolyticus group	2	0.0061
Tetragenococcus solitarius	2	0.0061
Vagococcus fluvialis	2	0.0061
Vibrio campbellii group	2	0.0061
Vibrio nereis	2	0.0061
Vibrio rumoiensis group	2	0.0061
AB480775_s	1	0.003
AM990454_s	1	0.003
AVBN_s	1	0.003
Acidocella aluminiidurans	1	0.003
Aeromicrobium erythreum group	1	0.003
Aneurinibacillus thermoaerophilus	1	0.003
Bacillus asahii	1	0.003
Bacillus fumarioli group	1	0.003
Bacillus gibsonii group	1	0.003
Bacillus koreensis	1	0.003
Bacillus oshimensis group	1	0.003
Bacteroides stercoris	1	0.003
Brachybacterium nesterenkovii group	1	0.003
Brevibacillus limnophilus	1	0.003
Brevibacterium avium	1	0.003
Brevibacterium senegalense group	1	0.003
CT978603_s	1	0.003
Comamonas aquatica	1	0.003
Corynebacterium ammoniagenes group	1	0.003
Corynebacterium sputi	1	0.003
Corynebacterium tuberculostearicum	1	0.003
Cronobacter dublinensis group	1	0.003
DQ451505_s	1	0.003
DQ521508_s	1	0.003
Demequina sediminicola	1	0.003
Devosia honganensis	1	0.003
EF405148_s	1	0.003
EU419143_s	1	0.003
FJ671194_s	1	0.003
FM873843_s	1	0.003
Flexivirga alba	1	0.003
GQ500752_s	1	0.003
Galbitalea soli	1	0.003
Garicola koreensis	1	0.003
HQ779892_s	1	0.003
JF266208_s	1	0.003
JN868904_s	1	0.003
JQEY_s	1	0.003
JTJJ_s group	1	0.003
JX001319_s	1	0.003
Kineococcus aurantiacus group	1	0.003
Kineosphaera nakaumiensis	1	0.003
Kluyvera georgiana	1	0.003
Kocuria palustris group	1	0.003
Kocuria rosea group	1	0.003
Leucobacter chromiireducens group	1	0.003
Mesorhizobium ciceri group	1	0.003
Ochrobactrum pseudogrignonense	1	0.003
Paracoccus marcusii group	1	0.003
Paracoccus yeei group	1	0.003
Pectobacterium carotovorum group	1	0.003
Photobacterium leiognathi	1	0.003
Pseudomonas corrugata group	1	0.003
Pseudomonas fulva group	1	0.003
Pseudomonas japonica	1	0.003
Pseudomonas putida group	1	0.003
Pseudorhodobacter ferrugineus group	1	0.003
Pseudoxanthomonas japonensis	1	0.003
Psychrobacter urativorans group	1	0.003
Rhizobium cellulosilyticum	1	0.003
Rhizobium massiliae group	1	0.003
Roseburia cecicola group	1	0.003
Roseomonas rhizosphaerae	1	0.003
Sanguibacter keddieii group	1	0.003
Serratia ficaria group	1	0.003
Shewanella marina	1	0.003
Sphingobium yanoikuyae group	1	0.003
Sphingomonas dokdonensis group	1	0.003
Sporosarcina koreensis group	1	0.003
Staphylococcus epidermidis group	1	0.003
Staphylococcus massiliensis	1	0.003
Sulfitobacter geojensis group	1	0.003
Tomitella biformata	1	0.003
Vibrio lentus group	1	0.003
Yaniella flava group	1	0.003

## Sheet: BJ
Taxon name	Count	Proportion(%)
Latilactobacillus sakei group	24278	53.7385
Tetragenococcus halophilus group	13444	29.7578
Vibrio chagasii group	5989	13.2565
Vibrio splendidus group	435	0.9629
Vibrio lentus group	320	0.7083
Vibrio litoralis	93	0.2059
Leuconostoc mesenteroides group	47	0.104
Leuconostoc carnosum	31	0.0686
Vibrio cyclitrophicus	29	0.0642
Tetragenococcus koreensis	27	0.0598
Vibrio rumoiensis group	20	0.0443
Carnobacterium funditum group	16	0.0354
Psychrobacter faecalis group	12	0.0266
Psychrobacter immobilis group	10	0.0221
Psychrobacter celer	9	0.0199
Vibrio artabrorum	9	0.0199
Buttiauxella agrestis group	8	0.0177
Megamonas funiformis	8	0.0177
Staphylococcus hominis group	7	0.0155
Vibrio mytili	7	0.0155
Aliivibrio logei group	6	0.0133
Ralstonia syzygii group	6	0.0133
Psychrobacter maritimus	5	0.0111
Vibrio madracius	5	0.0111
Enterococcus durans group	4	0.0089
Kocuria rhizophila group	4	0.0089
Marinilactibacillus psychrotolerans group	4	0.0089
Tetragenococcus muriaticus	4	0.0089
Vagococcus carniphilus	4	0.0089
Weissella hellenica group	4	0.0089
AJ583204_s	3	0.0066
Bacillus sonorensis group	3	0.0066
Enterococcus faecalis	3	0.0066
Lacticaseibacillus manihotivorans group	3	0.0066
Photobacterium aquimaris group	3	0.0066
Pseudoalteromonas atlantica group	3	0.0066
Ralstonia pickettii	3	0.0066
Vibrio aestuarianus	3	0.0066
Acinetobacter bereziniae group	2	0.0044
Bacillus pumilus group	2	0.0044
CCMM_s	2	0.0044
Carnobacterium divergens group	2	0.0044
Chromohalobacter beijerinckii group	2	0.0044
Cobetia amphilecti group	2	0.0044
Enterobacter cloacae group	2	0.0044
Photobacterium angustum	2	0.0044
Vagococcus fessus	2	0.0044
Vibrio halioticoli group	2	0.0044
Vibrio pacinii group	2	0.0044
Vibrio pelagius group	2	0.0044
AB606237_s	1	0.0022
AM696716_s	1	0.0022
Acidaminococcus fermentans	1	0.0022
Arcobacter marinus	1	0.0022
Bacillus altitudinis group	1	0.0022
Bacillus amyloliquefaciens group	1	0.0022
Bacillus subtilis group	1	0.0022
Bacteroides plebeius	1	0.0022
Cronobacter dublinensis group	1	0.0022
DQ796138_s	1	0.0022
EU459805_s	1	0.0022
Faecalibacterium prausnitzii	1	0.0022
HQ393427_s	1	0.0022
Helicobacter mesocricetorum group	1	0.0022
Holdemanella biformis	1	0.0022
Leuconostoc gelidum group	1	0.0022
Pediococcus argentinicus	1	0.0022
Photobacterium phosphoreum group	1	0.0022
Psychrobacter proteolyticus group	1	0.0022
Psychrobacter urativorans group	1	0.0022
Tetragenococcus osmophilus	1	0.0022
Tetragenococcus solitarius	1	0.0022
Vagococcus lutrae	1	0.0022
Vagococcus penaei	1	0.0022
Vibrio alginolyticus group	1	0.0022
Vibrio antiquarius	1	0.0022
Vibrio thalassae	1	0.0022

## Sheet: SA
Taxon name	Count	Proportion(%)
ABGR_s	12	0.0304
Acinetobacter lwoffii group	19	0.0482
Acinetobacter proteolyticus	2	0.0051
Acinetobacter ursingii	26	0.0659
Actinomyces odontolyticus	1	0.0025
Actinomyces_uc	1	0.0025
AF418942_g_uc	1	0.0025
AF418942_s	7	0.0177
AHBG_s group	1	0.0025
AJ583204_g_uc	37	0.0938
AJ583204_s	1523	3.8598
Alcanivorax marinus	2	0.0051
Alcanivorax_uc	14	0.0355
Alteromonas macleodii group	1	0.0025
AM990454_s	2	0.0051
ASZC_s	-	-
Atopostipes_uc	13	0.0329
AXAI_s group	8	0.0203
AY532586_s	6	0.0152
Bacillus_uc	14	0.0355
Bosea minatitlanensis group	2	0.0051
Bosea_uc	1	0.0025
Brachybacterium faecium group	7	0.0177
Bradyrhizobium cytisi group	20	0.0507
Bradyrhizobium japonicum group	16	0.0405
Bradyrhizobium_uc	1	0.0025
Brevibacterium avium	316	0.8009
Brevibacterium iodinum group	67	0.1698
Brevibacterium linens	1	0.0025
Brevibacterium picturae group	6	0.0152
Brevibacterium_uc	18	0.0456
Brevundimonas vesicularis group	4	0.0101
Brevundimonas_uc	1	0.0025
Bulleidia extructa	4	0.0101
Campylobacter concisus group	3	0.0076
Capnocytophaga leadbetteri	1	0.0025
Cetobacterium ceti	2	0.0051
Chromohalobacter beijerinckii group	66	0.1673
Chromohalobacter_uc	1	0.0025
Corynebacterium ammoniagenes group	13	0.0329
Corynebacterium durum	2	0.0051
Corynebacterium glycinophilum	11	0.0279
Corynebacterium_uc	1	0.0025
CP007496_s	2	0.0051
CP012071_s	4	0.0101
Curvibacter lanceolatus	6	0.0152
Dinoroseobacter_uc	1	0.0025
DQ088783_s	3	0.0076
DQ116008_s	11	0.0279
DQ451505_s	18	0.0456
DQ842544_s	71	0.1799
DQ984558_g_uc	1	0.0025
EF419382_s	1	0.0025
EF515912_g_uc	3	0.0076
EF562076_s	7	0.0177
Enhydrobacter aerosaccus group	35	0.0887
EU133389_s	1	0.0025
EU801583_s	11	0.0279
Eubacterium brachy	2	0.0051
FJ167494_g_uc	1	0.0025
FJ380155_s	1833	4.6454
FJ429315_s	23	0.0583
FJ715983_s	1	0.0025
Flavobacterium antarcticum	4	0.0101
Flavobacterium_uc	1	0.0025
Fodinibius_uc	95	0.2408
FR853543_s	21	0.0532
Fusobacterium_uc	1	0.0025
Gaiella occulta	10	0.0253
GG703879_s	1	0.0025
GQ264309_g_uc	2	0.0051
GQ264309_s	8	0.0203
Halanaerobium congolense	8	0.0203
Halanaerobium fermentans	1997	5.0611
Halanaerobium praevalens	47	0.1191
Halanaerobium saccharolyticum group	137	0.3472
Halanaerobium_uc	73	0.1850
Halomonas alimentaria	33	0.0836
Halomonas garicola	386	0.9783
Halomonas venusta group	23	0.0583
Halomonas_uc	788	1.9971
Halotalea_uc	-	-
Halovibrio_uc	1	0.0025
HQ418455_s	3	0.0076
HQ697702_s	13	0.0329
HQ864095_g_uc	1	0.0025
JF266208_s	8	0.0203
JF803519_s	1	0.0025
JH815185_s group	3	0.0076
Jilinibacillus_uc	1790	4.5365
JRKM_s	6	0.0152
JRMV_s	2	0.0051
JX001242_s	1	0.0025
JX133320_s	9	0.0228
KE952139_s	3	0.0076
KI421440_s group	1	0.0025
Kocuria rhizophila group	2	0.0051
Lactiplantibacillus plantarum group	1	0.0025
Lactobacillus_uc	4	0.0101
Lautropia mirabilis	1	0.0025
Lentibacillus salinarum	45	0.1140
Lentibacillus_uc	16907	42.8481
Leuconostoc_uc	1	0.0025
LSIJ_s	14	0.0355
Marinobacter piscensis	60	0.1521
Marinobacter_uc	3	0.0076
Mesorhizobium ciceri group	27	0.0684
Mesorhizobium_uc	2	0.0051
Mycoplasma salivarium	3	0.0076
Neisseria flava group	1	0.0025
Neisseria perflava group	13	0.0329
Neisseria subflava	6	0.0152
Neisseria_uc	2	0.0051
Oceanobacillus_uc	2	0.0051
Oribacterium sinus group	1	0.0025
Ornithinibacillus_uc	20	0.0507
PAC000336_s	15	0.0380
Paraburkholderia caledonica	409	1.0365
Paraburkholderia ferrariae	5	0.0127
Paraburkholderia insulsa	29	0.0735
Paraburkholderia kururiensis	103	0.2610
Paraburkholderia silvatlantica	16	0.0405
Paraburkholderia_uc	41	0.1039
Pelomonas saccharophila group	55	0.1394
Peptostreptococcus stomatis group	3	0.0076
Photobacterium angustum	6	0.0152
Photobacterium aquimaris group	2	0.0051
Photobacterium leiognathi	24	0.0608
Porphyromonas endodontalis	3	0.0076
Porphyromonas pasteri	8	0.0203
Prevotella melaninogenica	4	0.0101
Prevotella oris	10	0.0253
Prevotella oulorum	1	0.0025
Prevotella veroralis	1	0.0025
Prevotella_uc	2	0.0051
Pseudochrobactrum asaccharolyticum group	9	0.0228
Pseudogracilibacillus_uc	2531	6.4144
Pseudomonas geniculata group	17	0.0431
Pseudomonas halophila	11	0.0279
Pseudomonas migulae group	16	0.0405
Pseudomonas_uc	1	0.0025
Psychrobacter faecalis group	13	0.0329
Pycnococcus_uc	10	0.0253
Ralstonia pickettii	2021	5.1219
Ralstonia syzygii group	7	0.0177
Ralstonia_uc	64	0.1622
Rhodoplanes_uc	2	0.0051
Rothia aeria	1	0.0025
Rothia mucilaginosa	1	0.0025
Rothia_uc	1	0.0025
Salinicoccus_uc	2	0.0051
Salinisphaera japonica	11	0.0279
Salinisphaera_uc	1	0.0025
Sediminibacterium_uc	1	0.0025
Selenomonas sputigena	2	0.0051
Sneathia sanguinegens	3	0.0076
Sphingomonas trueperi group	1	0.0025
Sphingomonas_uc	1	0.0025
Staphylococcus cohnii group	94	0.2382
Staphylococcus saprophyticus group	12	0.0304
Staphylococcus_uc	1	0.0025
Stenotrophomonas_uc	2	0.0051
Streptococcus intermedius group	5	0.0127
Streptococcus parasanguinis group	2	0.0051
Streptococcus pneumoniae group	8	0.0203
Streptococcus salivarius group	4	0.0101
Streptococcus sanguinis	2	0.0051
Streptococcus sinensis group	5	0.0127
Streptococcus_uc	3	0.0076
Terrimonas lutea	8	0.0203
Tetragenococcus halophilus group	14	0.0355
Tetragenococcus muriaticus	4265	10.8090
Tetragenococcus_uc	150	0.3802
Tissierella_uc	6	0.0152
U70710_s	1	0.0025
Vagococcus penaei	1	0.0025
Veillonella_uc	2	0.0051
Vibrio antiquarius	1	0.0025
Vibrio campbellii group	12	0.0304
Vibrio halioticoli group	12	0.0304
Vibrio sagamiensis	7	0.0177
Vibrio_uc	4	0.0101
Virgibacillus natechei	21	0.0532
Virgibacillus siamensis	2	0.0051
Virgibacillus_uc	47	0.1191

## Sheet: JSS
Taxon name	Count	Proportion(%)
Enterococcus durans group	4411	14.6166
Tetragenococcus halophilus group	4391	14.5503
Clostridium arbusti	2488	8.2444
Leuconostoc mesenteroides group	2427	8.0423
Chromohalobacter beijerinckii group	1481	4.9075
Ignatzschineria indica	1341	4.4436
EU370420_s	1307	4.331
Enterococcus casseliflavus group	1076	3.5655
Staphylococcus cohnii group	707	2.3428
Lactobacillus brevis	642	2.1274
Lactiplantibacillus group	631	2.0909
Pseudomonas helleri	567	1.8789
Wohlfahrtiimonas chitiniclastica	439	1.4547
Paenochrobactrum gallinarii group	335	1.1101
Staphylococcus lentus group	328	1.0869
Sporolactobacillus nakayamae group	307	1.0173
JF101584_s	281	0.9311
Bacillus pumilus group	255	0.845
Ralstonia syzygii group	232	0.7688
Paenalcaligenes suwonensis	227	0.7522
Pseudochrobactrum asaccharolyticum group	218	0.7224
Myroides profundi	205	0.6793
Providencia burhodogranariea group	182	0.6031
Leucobacter komagatae group	167	0.5534
Weissella hellenica group	165	0.5468
Lacticaseibacillus casei group	164	0.5434
Latilactobacillus sakei group	164	0.5434
Acetobacter cerevisiae group	162	0.5368
Glutamicibacter nicotianae group	157	0.5202
Enterococcus dispar group	152	0.5037
Pseudomonas syringae group	128	0.4242
Leuconostoc lactis	126	0.4175
Pseudomonas fragi group	126	0.4175
Alcaligenes faecalis group	117	0.3877
Staphylococcus sciuri group	114	0.3778
Myroides odoratimimus	107	0.3546
Myroides odoratus	102	0.338
Leuconostoc citreum group	98	0.3247
Myroides xuanwuensis	78	0.2585
AJ583204_s	67	0.222
Bacillus amyloliquefaciens group	55	0.1823
Sphingobacterium faecium group	53	0.1756
Acetobacter pasteurianus group	51	0.169
Lampropedia puyangensis	50	0.1657
Vagococcus penaei	48	0.1591
FJ950566_s	42	0.1392
Enterococcus phoeniculicola group	41	0.1359
Ralstonia pickettii	33	0.1094
Gibbsiella papilionis	31	0.1027
Morganella psychrotolerans	31	0.1027
Brevibacterium picturae group	30	0.0994
Bordetella muralis group	29	0.0961
Enterococcus malodoratus group	29	0.0961
Pantoea ananatis group	29	0.0961
Chishuiella changwenlii	26	0.0862
Bacillus subtilis group	25	0.0828
Staphylococcus equorum group	25	0.0828
Wohlfahrtiimonas larvae	25	0.0828
Chromohalobacter canadensis	24	0.0795
Enterococcus sulfureus group	24	0.0795
Leucobacter aerolatus group	24	0.0795
Pediococcus acidilactici group	23	0.0762
Providencia alcalifaciens group	23	0.0762
Citrobacter freundii group	22	0.0729
Pseudomonas migulae group	22	0.0729
Staphylococcus saprophyticus group	22	0.0729
Corynebacterium glycinophilum	21	0.0696
Falsochrobactrum ovis	21	0.0696
Raoultella ornithinolytica group	21	0.0696
Morganella morganii group	20	0.0663
Serratia liquefaciens group	20	0.0663
Corynebacterium glutamicum	19	0.063
Escherichia hermannii group	18	0.0596
LGHZ_s	18	0.0596
Myroides guanonis	16	0.053
Pseudomonas endophytica	16	0.053
Enterobacter soli	15	0.0497
Jeotgalicoccus halotolerans group	15	0.0497
Staphylococcus succinus group	15	0.0497
Staphylococcus xylosus group	15	0.0497
Acinetobacter rudis	13	0.0431
Bacillus altitudinis group	13	0.0431
Franconibacter pulveris	13	0.0431
Leucobacter chromiireducens group	13	0.0431
Brevundimonas diminuta group	12	0.0398
Halomonas boliviensis group	12	0.0398
Halomonas gomseomensis group	12	0.0398
Halomonas zhanjiangensis	12	0.0398
Empedobacter brevis	11	0.0365
Enterobacter asburiae group	11	0.0365
Providencia rettgeri group	11	0.0365
Serratia plymuthica group	11	0.0365
Enterococcus faecalis	10	0.0331
Tetragenococcus koreensis	10	0.0331
Cronobacter sakazakii	9	0.0298
Leucobacter kyeonggiensis group	9	0.0298
Leuconostoc fallax	9	0.0298
Acinetobacter baumannii	8	0.0265
Corynebacterium variabile group	8	0.0265
Enterobacter cloacae group	8	0.0265
Enterococcus termitis	8	0.0265
JQ809688_s	8	0.0265
Kerstersia similis	8	0.0265
LATR_s group	8	0.0265
Leuconostoc pseudomesenteroides group	8	0.0265
Myroides phaeus	8	0.0265
Oceanobacillus oncorhynchi group	8	0.0265
Carnobacterium gallinarum group	7	0.0232
Enterococcus avium group	7	0.0232
Lactobacillus buchneri group	7	0.0232
Pseudomonas caeni	7	0.0232
Pseudomonas geniculata group	7	0.0232
Halomonas sulfidaeris group	6	0.0199
Lactobacillus odoratitofui group	6	0.0199
Lactobacillus parafarraginis	6	0.0199
Nesterenkonia lutea group	6	0.0199
Pantoea dispersa group	6	0.0199
Paraburkholderia kururiensis	6	0.0199
Pseudomonas synxantha	6	0.0199
Rahnella bruchi group	6	0.0199
Bacillus licheniformis group	5	0.0166
Brochothrix thermosphacta	5	0.0166
Erwinia persicina	5	0.0166
FJ892930_s	5	0.0166
Halomonas venusta group	5	0.0166
JTJJ_s group	5	0.0166
Lactobacillus harbinensis	5	0.0166
Sphingomonas paucimobilis group	5	0.0166
Stenotrophomonas rhizophila	5	0.0166
Bacillus cereus group	4	0.0133
Bacillus clausii group	4	0.0133
Brevibacterium iodinum group	4	0.0133
Corynebacterium ammoniagenes group	4	0.0133
Dietzia aerolata group	4	0.0133
Ewingella americana	4	0.0133
GQ133399_s	4	0.0133
Lactobacillus coryniformis group	4	0.0133
Lactobacillus perolens	4	0.0133
Lelliottia amnigena group	4	0.0133
Pediococcus inopinatus	4	0.0133
Pseudomonas caricapapayae group	4	0.0133
Pseudomonas fulva group	4	0.0133
Pseudomonas japonica	4	0.0133
Rahnella inusitata	4	0.0133
Acidocella aluminiidurans	3	0.0099
Acinetobacter bereziniae group	3	0.0099
Curtobacterium plantarum group	3	0.0099
DQ295907_s	3	0.0099
Erysipelothrix inopinata	3	0.0099
Herbaspirillum huttiense group	3	0.0099
JF237857_s	3	0.0099
Lactobacillus hilgardii group	3	0.0099
Mesorhizobium albiziae	3	0.0099
Mesorhizobium huakuii group	3	0.0099
Providencia stuartii group	3	0.0099
Pseudomonas oleovorans group	3	0.0099
Roseburia cecicola group	3	0.0099
Vagococcus fluvialis	3	0.0099
Yersinia massiliensis	3	0.0099
AB480775_s	2	0.0066
AF513933_s	2	0.0066
AKMR_s	2	0.0066
Arthrobacter globiformis group	2	0.0066
CP012362_s	2	0.0066
Catenibacterium mitsuokai	2	0.0066
Clostridium hiranonis	2	0.0066
DQ796138_s	2	0.0066
EU677394_s	2	0.0066
Empedobacter falsenii	2	0.0066
Enterobacter aerogenes group	2	0.0066
Enterococcus haemoperoxidus group	2	0.0066
Erwinia aphidicola	2	0.0066
Exiguobacterium acetylicum group	2	0.0066
HM127911_s	2	0.0066
Halomonas alimentaria	2	0.0066
Klebsiella pneumoniae group	2	0.0066
Kluyvera georgiana	2	0.0066
LGIT_s	2	0.0066
Lactobacillus rennini	2	0.0066
Lactococcus garvieae group	2	0.0066
Lentibacillus lacisalsi	2	0.0066
Methylobacterium aquaticum group	2	0.0066
Myroides injenensis	2	0.0066
Oceanobacillus gochujangensis	2	0.0066
Oceanobacillus picturae	2	0.0066
Ornithinibacillus scapharcae	2	0.0066
Paraburkholderia caledonica	2	0.0066
Paracoccus marinus group	2	0.0066
Pseudoclavibacter helvolus group	2	0.0066
Pseudomonas beteli	2	0.0066
Pseudomonas putida group	2	0.0066
Pseudomonas veronii group	2	0.0066
Salinicola salarius	2	0.0066
Sphingobacterium ginsenosidimutans group	2	0.0066
Sphingomonas echinoides group	2	0.0066
Vagococcus salmoninarum	2	0.0066
AB533955_s	1	0.0033
AY945890_s	1	0.0033
Achromobacter piechaudii group	1	0.0033
Arthrobacter endophyticus	1	0.0033
Bacillus mojavensis group	1	0.0033
Bacteroides nordii	1	0.0033
Bifidobacterium breve	1	0.0033
Bifidobacterium gallicum	1	0.0033
Bosea minatitlanensis group	1	0.0033
Brevibacterium avium	1	0.0033
Cedecea davisae group	1	0.0033
Cellulosimicrobium cellulans group	1	0.0033
Corynebacterium afermentans group	1	0.0033
Delftia tsuruhatensis group	1	0.0033
Dorea longicatena	1	0.0033
EF173343_s	1	0.0033
Erwinia billingiae group	1	0.0033
FJ943233_s	1	0.0033
Faecalibacterium prausnitzii	1	0.0033
JF266208_s	1	0.0033
JQ337061_s	1	0.0033
Kluyvera cryocrescens	1	0.0033
Kocuria rhizophila group	1	0.0033
Lentibacillus salicampi	1	0.0033
Leucobacter alluvii group	1	0.0033
Micrococcus luteus group	1	0.0033
Orbus sasakiae	1	0.0033
PAC000121_s	1	0.0033
PAC000681_s	1	0.0033
Pantoea allii	1	0.0033
Parabacteroides merdae	1	0.0033
Paracoccus koreensis	1	0.0033
Pseudomonas taetrolens	1	0.0033
Psychrobacter celer	1	0.0033
Psychrobacter immobilis group	1	0.0033
Rahnella aquatilis group	1	0.0033
Roseovarius litoreus	1	0.0033
Shewanella baltica	1	0.0033
Sphingobacterium psychroaquaticum	1	0.0033
Sphingobacterium yanglingense group	1	0.0033
Sphingomonas dokdonensis group	1	0.0033
Sphingomonas phyllosphaerae group	1	0.0033
Staphylococcus kloosii	1	0.0033
Streptococcus salivarius group	1	0.0033
Thermomonas haemolytica	1	0.0033
Vagococcus fessus	1	0.0033
Vibrionimonas magnilacihabitans	1	0.0033
Virgibacillus pantothenticus group	1	0.0033

## Sheet: JSP
Taxon name	Count	Proportion(%)
Enterococcus durans group	13928	32.7911
Clostridium arbusti	11432	26.9147
Tetragenococcus halophilus group	5688	13.3914
Sporolactobacillus nakayamae group	2677	6.3025
Bacillus subtilis group	1660	3.9082
Staphylococcus lentus group	1291	3.0394
Leuconostoc mesenteroides group	1037	2.4414
Staphylococcus sciuri group	900	2.1189
Enterococcus phoeniculicola group	551	1.2972
Bacillus amyloliquefaciens group	463	1.0901
Staphylococcus xylosus group	394	0.9276
Bacillus carboniphilus group	210	0.4944
Bacillus licheniformis group	175	0.412
Tetragenococcus koreensis	118	0.2778
Staphylococcus saprophyticus group	87	0.2048
Lacticaseibacillus sakei group	83	0.1954
AJ583204_s	72	0.1695
Bacillus altitudinis group	71	0.1672
Ralstonia syzygii group	68	0.1601
Bacillus pumilus group	59	0.1389
Bacillus clausii group	54	0.1271
Staphylococcus equorum group	54	0.1271
Staphylococcus succinus group	53	0.1248
Ignatzschineria indica	49	0.1154
Lactobacillus plantarum group	49	0.1154
Enterococcus faecalis	48	0.113
Bacillus decisifrondis group	45	0.1059
Pediococcus acidilactici group	36	0.0848
Bacillus mojavensis group	33	0.0777
Pseudomonas fragi group	33	0.0777
Bacillus nanhaiisediminis	31	0.073
Lacticaseibacillus casei group	31	0.073
Lactobacillus brevis	27	0.0636
Leuconostoc lactis	25	0.0589
Corynebacterium ammoniagenes group	24	0.0565
AM930316_s	22	0.0518
Staphylococcus cohnii group	21	0.0494
Enterococcus dispar group	19	0.0447
Paraburkholderia kururiensis	19	0.0447
Anaerobacillus alkalidiazotrophicus group	18	0.0424
Bacillus oleronius	16	0.0377
Ralstonia pickettii	16	0.0377
Pseudomonas helleri	14	0.033
Staphylococcus kloosii	14	0.033
Glutamicibacter nicotianae group	13	0.0306
Enterococcus malodoratus group	12	0.0283
Hafnia alvei group	12	0.0283
Clostridium tyrobutyricum	11	0.0259
Enterococcus termitis	11	0.0259
Leuconostoc citreum group	11	0.0259
Bacillus thermoamylovorans group	10	0.0235
Enterococcus sulfureus group	10	0.0235
Bacillus dabaoshanensis	9	0.0212
Lentilactobacillus buchneri group	9	0.0212
EU370420_s	8	0.0188
Enterococcus avium group	8	0.0188
DQ345464_s	6	0.0141
Enterococcus casseliflavus group	6	0.0141
Brevibacterium avium	5	0.0118
CP003261_s	5	0.0118
Curtobacterium plantarum group	5	0.0118
Erwinia persicina	5	0.0118
Nocardiopsis alba group	5	0.0118
Pseudomonas migulae group	5	0.0118
Terribacillus halophilus	5	0.0118
Bacillus aquimaris	4	0.0094
Bacillus idriensis	4	0.0094
Enterococcus italicus group	4	0.0094
Erwinia billingiae group	4	0.0094
Jeotgalicoccus halotolerans group	4	0.0094
Leuconostoc pseudomesenteroides group	4	0.0094
Pantoea ananatis group	4	0.0094
Rahnella bruchi group	4	0.0094
Rahnella inusitata	4	0.0094
Sporosarcina aquimarina	4	0.0094
Weissella hellenica group	4	0.0094
Arthrobacter globiformis group	3	0.0071
HQ397054_s	3	0.0071
Herbaspirillum huttiense group	3	0.0071
JF266208_s	3	0.0071
Lactobacillus coryniformis group	3	0.0071
Paenibacillus amylolyticus group	3	0.0071
Providencia burhodogranariea group	3	0.0071
Pseudomonas syringae group	3	0.0071
Rummeliibacillus stabekisii	3	0.0071
Bacillus oleivorans	2	0.0047
Bacillus shacheensis	2	0.0047
Bacillus sonorensis group	2	0.0047
Brachybacterium tyrofermentans	2	0.0047
Coprococcus eutactus	2	0.0047
Enterococcus canis	2	0.0047
Faecalibacterium prausnitzii	2	0.0047
GQ500752_s	2	0.0047
Glutamicibacter creatinolyticus	2	0.0047
Leuconostoc gelidum group	2	0.0047
Morganella psychrotolerans	2	0.0047
Mycobacterium llatzerense	2	0.0047
PAC000336_s	2	0.0047
Photobacterium indicum	2	0.0047
Psychrobacter alimentarius group	2	0.0047
Salinicoccus kunmingensis	2	0.0047
Serratia plymuthica group	2	0.0047
Streptococcus parasanguinis group	2	0.0047
AF269002_s	1	0.0024
AVDB_s	1	0.0024
Acinetobacter baumannii	1	0.0024
Bacillus circulans	1	0.0024
Bacillus endolithicus	1	0.0024
Bacillus galactosidilyticus group	1	0.0024
Bacillus indicus group	1	0.0024
Bacillus lonarensis	1	0.0024
Bacillus seohaeanensis	1	0.0024
Bacteroides coprophilus	1	0.0024
Brachybacterium alimentarium group	1	0.0024
Bradyrhizobium yuanmingense group	1	0.0024
Brochothrix thermosphacta	1	0.0024
Buttiauxella agrestis group	1	0.0024
Caulobacter ginsengisoli	1	0.0024
Corynebacterium sputi	1	0.0024
EF404137_s	1	0.0024
EF406368_s	1	0.0024
Enterobacter cloacae group	1	0.0024
Enterococcus haemoperoxidus group	1	0.0024
Enterococcus saccharolyticus group	1	0.0024
Ewingella americana	1	0.0024
HQ393409_s	1	0.0024
JF101584_s	1	0.0024
JFGT_s	1	0.0024
JX456425_s	1	0.0024
Kocuria palustris group	1	0.0024
Kocuria rhizophila group	1	0.0024
Lactobacillus rennini	1	0.0024
Leucobacter komagatae group	1	0.0024
Neisseria perflava group	1	0.0024
Nocardiopsis terrae	1	0.0024
Paenibacillus borealis group	1	0.0024
Paraburkholderia ferrariae	1	0.0024
Paraburkholderia insulsa	1	0.0024
Pelomonas saccharophila group	1	0.0024
Pseudomonas caricapapayae group	1	0.0024
Pseudomonas japonica	1	0.0024
Serratia liquefaciens group	1	0.0024
Sporosarcina saromensis	1	0.0024
Vibrio chagasii group	1	0.0024
Virgibacillus pantothenticus group	1	0.0024
Yersinia massiliensis	1	0.0024
Yersinia ruckeri	1	0.0024
